# Supplementary material
Source: PubMed Central journal article supplement (PMC4456287)
Supplement: NIHMS679218-supplement-2.pdf [file NIHMS679218-supplement-2.pdf]

## Supplementary Figure Legends

**Figure S1, related to Figure 1.** Biochemical characterization of the minimal MRG-binding domain of MRGBP. (A) A cartoon representation of the predicted secondary structural elements in MRGBP. Also shown are the constructs used for the studies below and the approximate location of the FxLP motif. (B) Chromatograms from SEC experiments conducted using a Superdex 75 column with co-purified MRGBP and MRG15 MRG proteins. These assays were conducted with MRGBP<sup>32-119</sup> (*left panel*) and MRGBP<sup>69-119</sup> (*right panel*) constructs. Proteins in individual fractions were resolved by SDS-PAGE and detected by Coomassie staining.

**Figure S2, related to Figure 1.** Solution NMR spectra of MRGBP MBD and MRG15 MRG establishing a direct interaction between the proteins. <sup>1</sup>H-<sup>15</sup>N correlated spectra of <sup>15</sup>N-MRGBP MBD recorded in the absence (*black*) and presence (*red*) of one equivalent of unlabeled MRG15 MRG (*left panel*) and that of <sup>15</sup>N-MRG15 MRG recorded in the absence (*black*) and presence (*red*) of one equivalent of MRGBP MBD (*right panel*). The spectra were recorded at 35 °C under the same solution conditions.

**Figure S3, related to Figure 2.** A MONSTER-derived catalog of non-covalent interactions in the MRG15 MRG-MRGBP MBD complex. MRG15 residues are shown in blue while the MRGBP residues are shown in magenta. The gray, green, red, and purple lines denote hydrophobic, electrostatic, hydrogen bonding, and salt-bridge interactions, respectively. Only those interactions consistently found in a majority of conformers (>50%) in the ensemble are shown.

**Figure S4, related to Figure 4.** PALB2 MBD<sup>579-629</sup> binds MRG15 MRG with high affinity. A representative binding isotherm from titrations of PALB2 MBD (in the syringe) with MRG15 MRG (in the cell). The concentrations were 200 and 20 μM, respectively, and the experiments were conducted at 25 °C.

## Supplementary Table Legend

**Table S1, related to Figure 3.** Equilibrium dissociation constants for various MRG complexes.

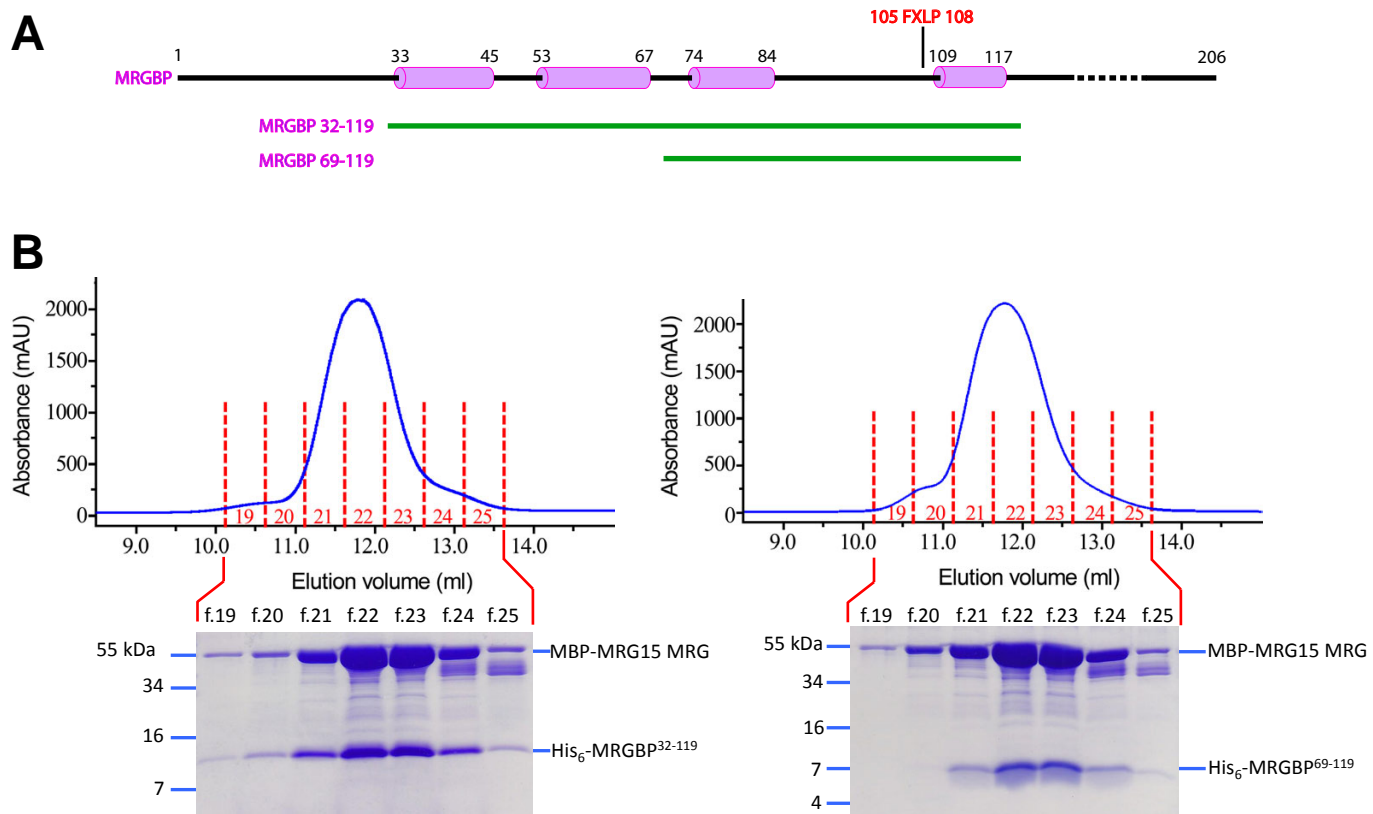

**Figure S1**

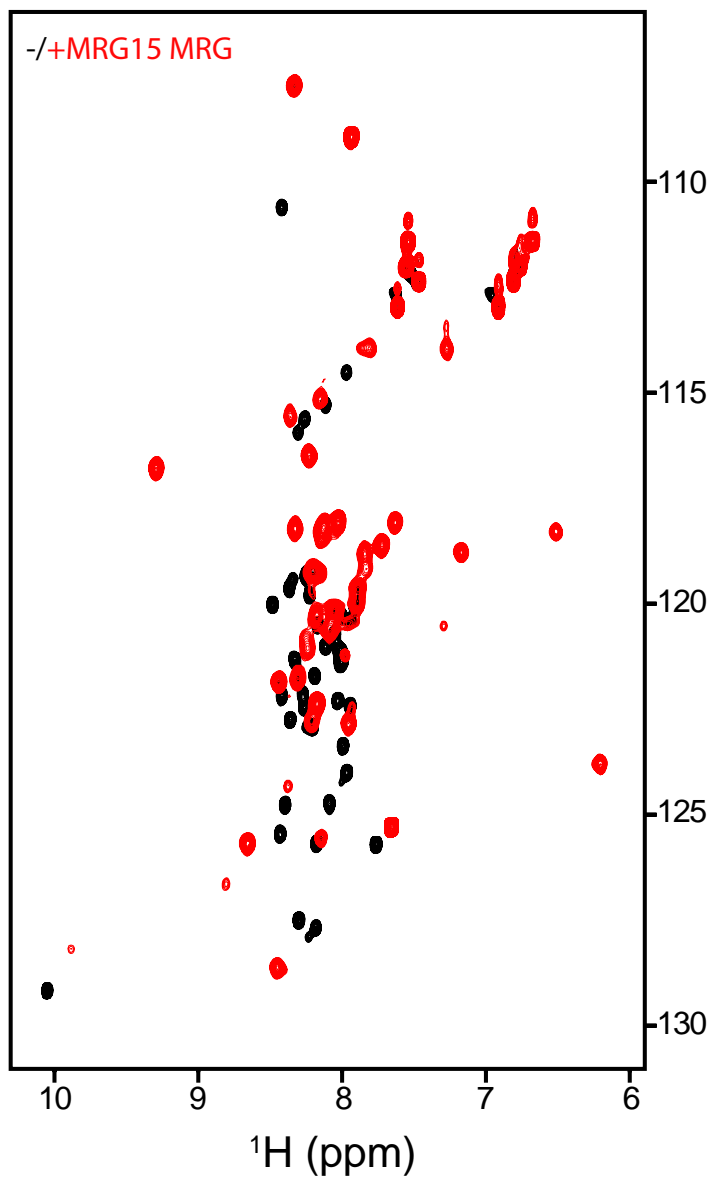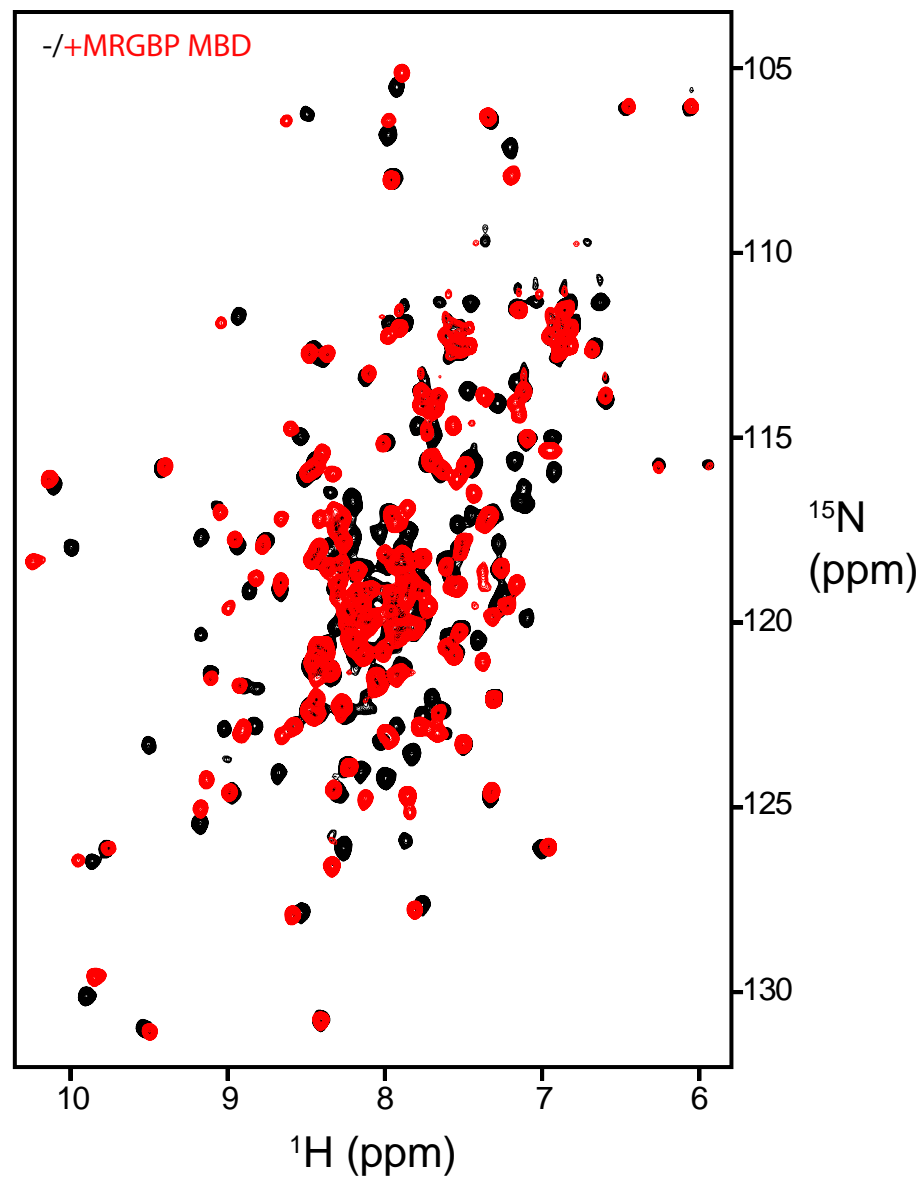

**Figure S2**

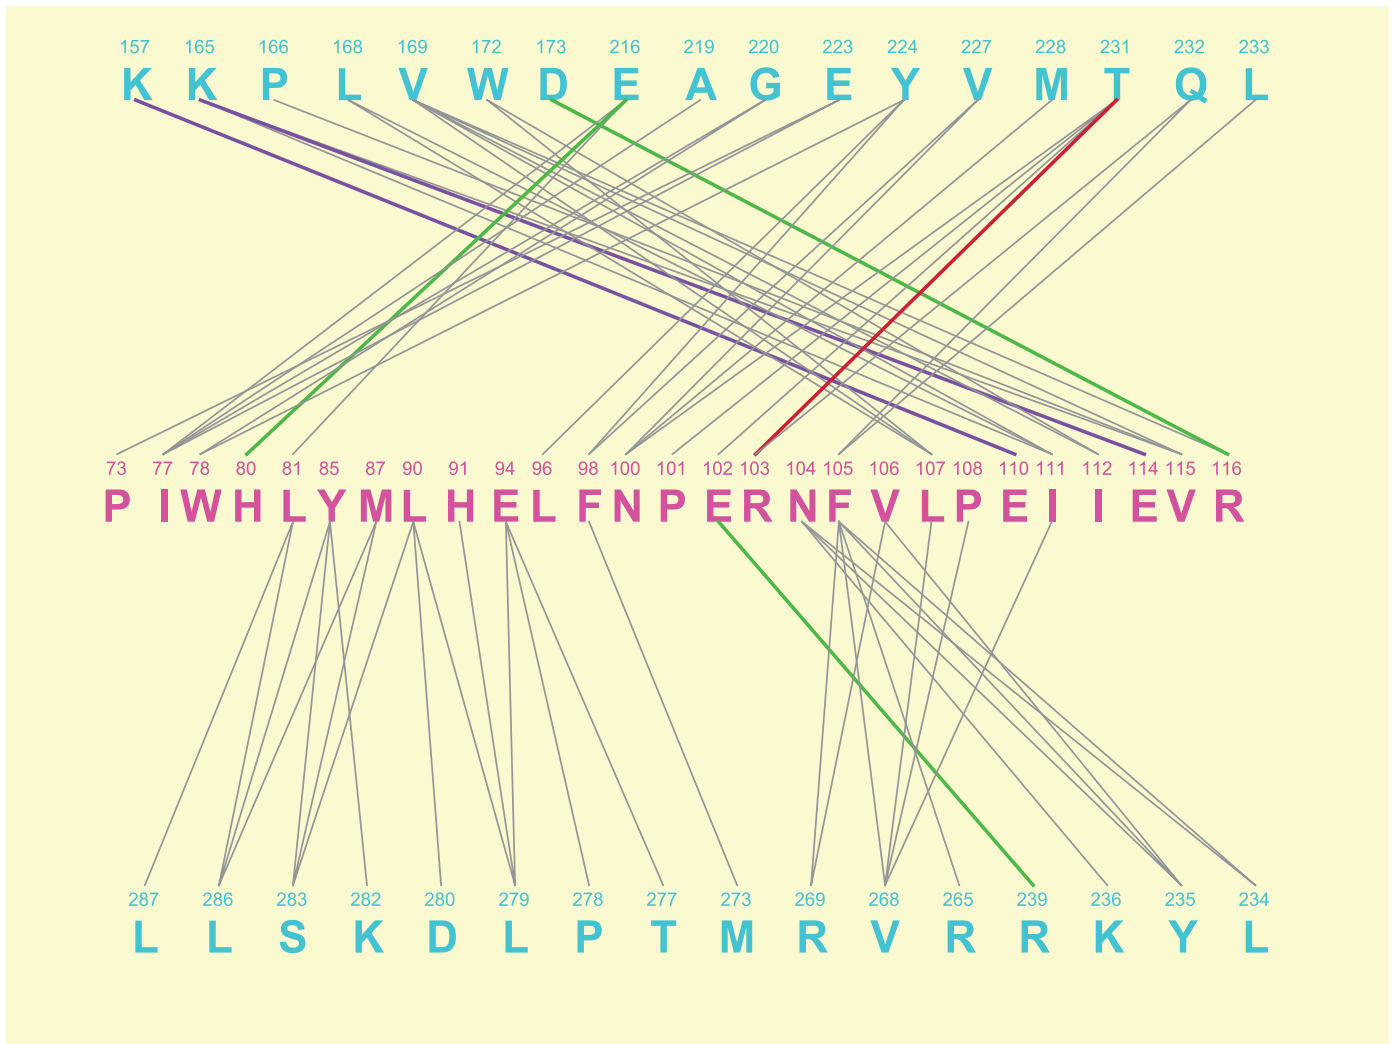

**Figure S3**

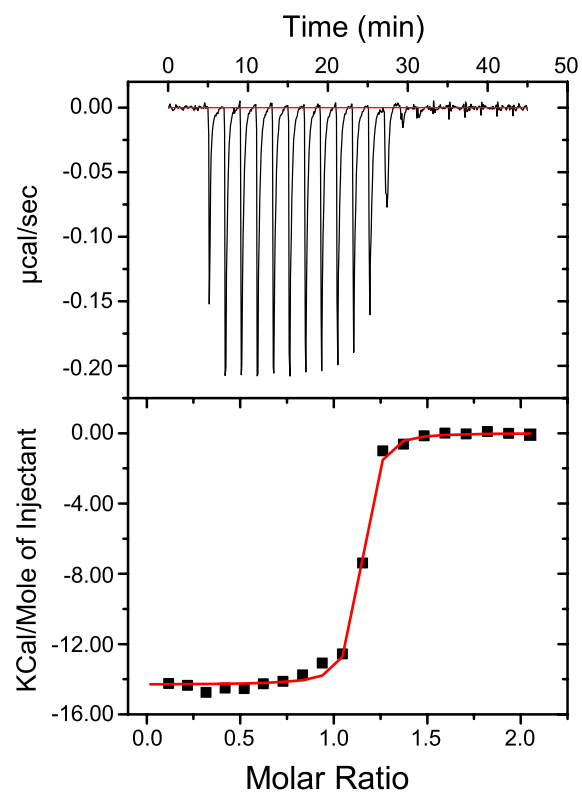

**Figure S4**

**Table S1, related to Figure 3.** Equilibrium Dissociation Constants for Various MRG Complexes

| <i>Reactants</i>            | <i>K<sub>d</sub> (μM)</i>  |
|-----------------------------|----------------------------|
| MRG15 MRG + MRGBP MBD       | 0.058 ± 0.009              |
| MRG15 MRG + MRGBP MBD W78A  | — <sup>a</sup>             |
| MRG15 MRG + MRGBP MBD M84A  | 0.151 ± 0.048 <sup>b</sup> |
| MRG15 MRG + MRGBP MBD F105A | — <sup>a</sup>             |
| MRG15 MRG + MRGBP MBD I112A | 0.750 ± 0.210              |
| MRGBP MBD + MRG15 MRG L168A | 0.526 ± 0.080 <sup>b</sup> |
| MRGBP MBD + MRG15 MRG W172A | 0.424 ± 0.041              |
| MRGBP MBD + MRG15 MRG M273A | 0.068 ± 0.016              |
| MRGBP MBD + MRG15 MRG L287A | 0.133 ± 0.025              |
| MRG15 MRG + PALB2 MBD       | 0.022 ± 0.004              |

<sup>a</sup>: could not be reliably quantified due to poor binding

<sup>b</sup>: average values from two independent measurements; all others from three independent measurements
